# Supplementary material for: DNA binding strength increases the processivity and activity of a Y-Family DNA polymerase
Source: PubMed Central journal article supplement (PMC5500549; doi:10.1038/s41598-017-02578-3), 2017-07-06
Supplement: 41598_2017_2578_MOESM1_ESM.pdf [file 41598_2017_2578_MOESM1_ESM.pdf]

## **DNA binding strength increases the processivity and activity of a Y-Family DNA polymerase**

Jing Wu<sup>1,2</sup>, Alexandra De Paz<sup>1</sup>, Bradley M. Zamft<sup>3</sup>, Adam H. Marblestone<sup>4,5</sup>, Edward S. Boyden<sup>6,7,8</sup>, Konrad P. Kording<sup>9,10</sup> and Keith E.J. Tyo\*<sup>1</sup>

1 Department of Chemical and Biological Engineering, Northwestern University, Evanston, Illinois, United States of America,

2 The school of pharmacy, Jiangnan University, Wuxi, Jiangsu Province, China,

3 Department of Genetics, Harvard Medical School, Boston, Massachusetts, United States of America,

4 Biophysics Program, Harvard University, Boston, Massachusetts, United States of America,

5 Wyss Institute, Harvard University, Boston, Massachusetts, United States of America,

6 Media Lab, Massachusetts Institute of Technology, Cambridge, Massachusetts, United States of America,

7 Department of Biological Engineering, Massachusetts Institute of Technology, Cambridge, Massachusetts, United States of America,

8 McGovern Institute, Massachusetts Institute of Technology, Cambridge, Massachusetts, United States of America,

9 Department of Physiology, Northwestern University, Chicago, Illinois, United States of America,

10 Department of Applied Mathematics, Northwestern University, Chicago, Illinois, United States of America

Manuscript in preparation for:  
Scientific Reports

\*Corresponding author:  
Telephone: 847.868.0319  
Fax: 847.467.2972  
email: k-tyo@northwestern.edu

**Supplemental Figure 1. Full-length images on processivity of Dbh and the variants.** (A)Dbh, (B) Sdbh,(C) SdbhKSKIP241-245RVRKS, (D) SdbhM76I.

**Supplemental Figure2. Steady-state kinetic analysis of dCTP and dATP incorporation on unmodified G and oxoG-modified templates by Dbh and the**

**varitants.** The reaction contained a template with G or 8-oxoG at position X as

follows  $5\text{'-FAM-GGTTGGATGGTAG-3'}$  and

$5\text{'-CTAAC}\underline{\text{X}}\text{CTACCATCCAACC-3'}$ .The PAGE gels (top panels) show data as a

function of dCTP/ dATP concentration, while the plots (bottom panels) measure the

log of the frequency of nucleotide insertion for dCTP/ dATP. The labeled (-1) position

represents the 13-mer primer with the 3'-end positioned one base before the G or

oxoG; The labeled (0) position represents the 14-mer products with one base opposite

G or oxoG; See Table 3 for  $V_{\max}$  and  $K_m$  values.
